# Supplementary material for: Unexpected Absence of Skeletal Responses to Dietary Magnesium Depletion: Basis for Future Perspectives?
Source: MDPI journal article supplement (doi:10.3390/biomedicines11030655), 2023-02-21
Supplement: s1 [file s1]

**Table S1.** Composition of the experimental diets.

|                         | <b>Mg-Free Diet</b> | <b>Control Diet</b> |
|-------------------------|---------------------|---------------------|
| <b>Contents (%)</b>     |                     |                     |
| Crude protein           | 15.8                | 19.2                |
| Crude fat               | 7.0                 | 4.1                 |
| Crude fibre             | 5.0                 | 6.1                 |
| Crude ash               | 3.6                 | 5.9                 |
| Carbohydrates           | 66.8                | 45.0                |
| Calcium                 | 0.6                 | 0.6                 |
| Magnesium               | -----               | 0.2                 |
| Phosphorous             | 0.5                 | 0.5                 |
| Sodium                  | 0.2                 | 0.2                 |
| Potassium               | 0.6                 | 0.9                 |
| Lysine                  | 1.4                 | 8.1                 |
| Methionine              | 0.7                 | 2.7                 |
| Met+Cys                 | 1.1                 | 5.9                 |
| <b>Energy (kcal/kg)</b> | <b>3930</b>         | <b>3227</b>         |
| Kcal% Protein           | 16                  | 24                  |
| Kcal% Fat               | 16                  | 11                  |
| Kcal% Carbohydrates     | 68                  | 65                  |
